# Supplementary material for: Pancreatic alpha cell mass in European subjects with type 2 diabetes
Source: Springer Nature journal article supplement (doi:10.1007/s00125-011-2118-4), 2011-04-04
Supplement: MOESM2 [file 8089946]

**Electronic supplementary material****ESM Table 1** Characteristics of non-diabetic subjects

| <b>ID</b>    | <b>Sex</b> | <b>Age<br/>(years)</b> | <b>BMI<br/>(kg/m<sup>2</sup>)</b> | <b>Cause of death</b>                           | <b>Blood glucose<br/>&lt;6 mmol/l<sup>a</sup></b> | <b>Beta cell<br/>mass (mg)</b> | <b>Alpha cell<br/>mass (mg)</b> |
|--------------|------------|------------------------|-----------------------------------|-------------------------------------------------|---------------------------------------------------|--------------------------------|---------------------------------|
| <b>ND 1</b>  | M          | 39                     | 22.7                              | Cirrhosis + pneumonia                           | Hosp                                              | 1,269                          | 760                             |
| <b>ND 2</b>  | F          | 41                     | 24.2                              | Stroke                                          | Hosp                                              | 885                            | 313                             |
| <b>ND 3</b>  | F          | 42                     | 27.9                              | Gastrointestinal haemorrhage                    | Hosp                                              | 1,399                          | 437                             |
| <b>ND 4</b>  | F          | 44                     | 18.0                              | Hypocalcaemia                                   | Hosp                                              | 769                            | 294                             |
| <b>ND 5</b>  | M          | 45                     | 23.8                              | Polytrauma                                      | Hosp                                              | 1,361                          | 593                             |
| <b>ND 6</b>  | M          | 46                     | 21.6                              | Throat carcinoma + postoperative cardiac arrest | Hosp                                              | 924                            | 254                             |
| <b>ND 7</b>  | F          | 49                     | 22.9                              | Leukaemia + respiratory distress syndrome       | Hosp                                              | 908                            | 425                             |
| <b>ND 8</b>  | F          | 50                     | 24.8                              | Neurodegenerative disease                       | Hosp                                              | 784                            | 191                             |
| <b>ND 9</b>  | M          | 50                     | 30.4                              | Cirrhosis                                       | Hosp                                              | 1,349                          | 954                             |
| <b>ND 10</b> | M          | 51                     | 22.4                              | Myocardial infarction                           | Hosp                                              | 549                            | 179                             |
| <b>ND 11</b> | M          | 53                     | 28.4                              | Stroke                                          | Out                                               | 967                            | 411                             |
| <b>ND 12</b> | M          | 54                     | 29.8                              | Myeloma                                         | Out                                               | 890                            | 282                             |
| <b>ND 13</b> | M          | 57                     | 20.6                              | Myocardial infarction                           | Out                                               | 549                            | 180                             |
| <b>ND 14</b> | M          | 59                     | 20.4                              | Pulmonary thromboembolism                       | Hosp                                              | 1,173                          | 518                             |
| <b>ND 15</b> | F          | 60                     | 20.5                              | Ventricular fibrillation                        | Hosp                                              | 764                            | 281                             |
| <b>ND 16</b> | M          | 60                     | 23.7                              | Myeloma                                         | Hosp                                              | 519                            | 166                             |
| <b>ND 17</b> | M          | 61                     | 19.8                              | Lymphoma                                        | Hosp                                              | 777                            | 422                             |
| <b>ND 18</b> | F          | 61                     | 25.4                              | Sepsis                                          | Hosp                                              | 1,107                          | 665                             |
| <b>ND 19</b> | M          | 63                     | 24.5                              | Congestive heart failure                        | Out                                               | 744                            | 324                             |
| <b>ND 20</b> | M          | 63                     | 24.8                              | Myeloma                                         | Hosp                                              | 760                            | 288                             |
| <b>ND 21</b> | M          | 63                     | 26.4                              | Lung carcinoma                                  | Hosp                                              | 813                            | 330                             |
| <b>ND 22</b> | M          | 63                     | 31.2                              | Leukaemia + congestive heart failure            | Hosp                                              | 633                            | 213                             |
| <b>ND 23</b> | M          | 63                     | 39.4                              | Post-surgical cardiac arrest                    | Hosp                                              | 1,006                          | 438                             |

| <b>ID</b>    | <b>Sex</b> | <b>Age (years)</b> | <b>BMI (kg/m<sup>2</sup>)</b> | <b>Cause of death</b>                            | <b>Blood glucose &lt;6 mmol/l<sup>a</sup></b> | <b>Beta cell mass (mg)</b> | <b>Alpha cell mass (mg)</b> |
|--------------|------------|--------------------|-------------------------------|--------------------------------------------------|-----------------------------------------------|----------------------------|-----------------------------|
| <b>ND 24</b> | M          | 64                 | 27.9                          | Myocardial infarction                            | Hosp                                          | 451                        | 253                         |
| <b>ND 25</b> | M          | 65                 | 24.3                          | Pharynx carcinoma + postoperative complications  | Hosp                                          | 1,266                      | 907                         |
| <b>ND 26</b> | F          | 66                 | 29.9                          | Congestive heart failure                         | Hosp                                          | 752                        | 225                         |
| <b>ND 27</b> | F          | 68                 | 23.6                          | Sepsis + shock                                   | Hosp                                          | 1,298                      | 305                         |
| <b>ND 28</b> | M          | 68                 | 26.9                          | Cerebral lymphoma + sepsis                       | Hosp                                          | 1,197                      | 304                         |
| <b>ND 29</b> | M          | 68                 | 28.8                          | Myocardial infarction                            | Hosp                                          | 1,411                      | 533                         |
| <b>ND 30</b> | M          | 69                 | 30.8                          | Dissection of aorta                              | Hosp                                          | 1,220                      | 534                         |
| <b>ND 31</b> | M          | 69                 | 31.3                          | Myocardial infarction                            | Out                                           | 983                        | 500                         |
| <b>ND 32</b> | M          | 69                 | 38.3                          | Post-surgical multisystem failure                | Hosp                                          | 1,351                      | 503                         |
| <b>ND 33</b> | M          | 71                 | 28.0                          | Myocardial infarction                            | Out                                           | 563                        | 303                         |
| <b>ND 34</b> | M          | 72                 | 26.4                          | Ventricular fibrillation                         | Hosp                                          | 824                        | 337                         |
| <b>ND 35</b> | M          | 72                 | 27.0                          | Stroke                                           | Out                                           | 1,508                      | 372                         |
| <b>ND 36</b> | M          | 72                 | 31.1                          | Respiratory distress syndrome                    | Hosp                                          | 1,030                      | 274                         |
| <b>ND 37</b> | M          | 73                 | 21.0                          | Lung carcinoma                                   | Hosp                                          | 277                        | 134                         |
| <b>ND 38</b> | F          | 73                 | 21.8                          | Pneumonia                                        | Hosp                                          | 541                        | 147                         |
| <b>ND 39</b> | M          | 74                 | 27.0                          | Aortic valve stenosis                            | Hosp                                          | 852                        | 289                         |
| <b>ND 40</b> | F          | 74                 | 32.9                          | Breast cancer + myocardial infarction            | Hosp                                          | 731                        | 183                         |
| <b>ND 41</b> | F          | 75                 | 24.2                          | Stroke                                           | Out                                           | 856                        | 415                         |
| <b>ND 42</b> | F          | 77                 | 16.6                          | Hip fracture + pneumonia                         | Hosp                                          | 461                        | 139                         |
| <b>ND 43</b> | M          | 77                 | 26.0                          | Larynx carcinoma                                 | Hosp                                          | 977                        | 211                         |
| <b>ND 44</b> | F          | 79                 | 35.4                          | Myocardial infarction + ventricular fibrillation | Hosp                                          | 1,126                      | 352                         |
| <b>ND 45</b> | M          | 80                 | 20.5                          | Stroke                                           | Out                                           | 582                        | 156                         |
| <b>ND 46</b> | M          | 81                 | 27.6                          | Bronchopneumonia                                 | Out                                           | 726                        | 394                         |
| <b>ND 47</b> | M          | 82                 | 28.7                          | Myocardial infarction                            | Out                                           | 685                        | 212                         |
| <b>ND 48</b> | F          | 84                 | 18.2                          | Bronchopneumopathy                               | Out                                           | 1,097                      | 333                         |

| <b>ID</b>    | <b>Sex</b> | <b>Age<br/>(years)</b> | <b>BMI<br/>(kg/m<sup>2</sup>)</b> | <b>Cause of death</b>    | <b>Blood glucose<br/>&lt;6 mmol/l<sup>a</sup></b> | <b>Beta cell<br/>mass (mg)</b> | <b>Alpha cell<br/>mass (mg)</b> |
|--------------|------------|------------------------|-----------------------------------|--------------------------|---------------------------------------------------|--------------------------------|---------------------------------|
| <b>ND 49</b> | F          | 85                     | 22.0                              | Stroke                   | Hosp                                              | 719                            | 271                             |
| <b>ND 50</b> | F          | 86                     | 20.8                              | Congestive heart failure | Hosp                                              | 237                            | 100                             |
| <b>ND 51</b> | M          | 87                     | 29.1                              | Stroke                   | Out                                               | 733                            | 227                             |
| <b>ND 52</b> | M          | 91                     | 22.7                              | Pulmonary embolism       | Out                                               | 835                            | 217                             |

<sup>a</sup>Blood glucose measured below 6 mmol/l during a recent outpatient visit (Out) or hospitalisation (Hosp)

F, female; M, male
