# Supplementary material for: Pancreatic alpha cell mass in European subjects with type 2 diabetes
Source: Springer Nature journal article supplement (doi:10.1007/s00125-011-2118-4), 2011-04-04
Supplement: MOESM3 [file 8089946]

**Electronic supplementary material****ESM Table 2** Characteristics of type 2 diabetic subjects

| <b>ID</b>     | <b>Sex</b> | <b>Age (years)</b> | <b>BMI (kg/m<sup>2</sup>)</b> | <b>Cause of death</b>                    | <b>Treatment</b>    | <b>Beta cell mass (mg)</b> | <b>Alpha cell mass (mg)</b> |
|---------------|------------|--------------------|-------------------------------|------------------------------------------|---------------------|----------------------------|-----------------------------|
| <b>T2D 1</b>  | M          | 50                 | 32.4                          | Congestive cardiomyopathy                | Oral drug           | 546                        | 243                         |
| <b>T2D 2</b>  | M          | 52                 | 20.2                          | Septic shock + myocardial infarction     | Oral drug           | 506                        | 338                         |
| <b>T2D 3</b>  | F          | 54                 | 20.5                          | Mesenteric infarction                    | Insulin + Oral drug | 105                        | 307                         |
| <b>T2D 4</b>  | M          | 54                 | 36.0                          | Mouth carcinoma + cardiogenic shock      | Insulin             | 815                        | 391                         |
| <b>T2D 5</b>  | M          | 55                 | 29.4                          | Subacute pericarditis + thromboembolism  | Insulin             | 521                        | 275                         |
| <b>T2D 6</b>  | M          | 55                 | 35.6                          | Lymphoma + septic shock                  | Insulin             | 972                        | 627                         |
| <b>T2D 7</b>  | F          | 56                 | 45.8                          | Complications post orthopaedic surgery   | Insulin + Oral drug | 759                        | 618                         |
| <b>T2D 8</b>  | M          | 57                 | 33.6                          | Intestinal infarction                    | Oral drug           | 1,362                      | 817                         |
| <b>T2D 9</b>  | M          | 58                 | 34.7                          | Bacterial endocarditis + thromboembolism | Oral drug           | 1,105                      | 837                         |
| <b>T2D 10</b> | F          | 59                 | 28.3                          | Stroke                                   | Insulin             | 816                        | 587                         |
| <b>T2D 11</b> | M          | 59                 | 32.6                          | Cardiopathy                              | Insulin             | 253                        | 196                         |
| <b>T2D 12</b> | F          | 59                 | 33.9                          | Sepsis                                   | Insulin             | 840                        | 288                         |
| <b>T2D 13</b> | M          | 61                 | 24.5                          | Myocardial infarction                    | Insulin             | 392                        | 215                         |
| <b>T2D 14</b> | M          | 62                 | 25.4                          | Septic shock + pulmonary insufficiency   | Oral drug           | 502                        | 369                         |
| <b>T2D 15</b> | M          | 63                 | 26.4                          | Bacterial endocarditis + thromboembolism | Oral drug           | 606                        | 235                         |
| <b>T2D 16</b> | F          | 64                 | 31.9                          | Ischaemic heart disease                  | Insulin             | 431                        | 322                         |
| <b>T2D 17</b> | M          | 64                 | 36.0                          | Myocardial infarction                    | Insulin             | 194                        | 263                         |
| <b>T2D 18</b> | F          | 65                 | 24.8                          | Myocardial infarction                    | Oral drug           | 345                        | 359                         |
| <b>T2D 19</b> | F          | 65                 | 43.0                          | Myocardial infarction                    | Oral drug           | 1,078                      | 320                         |
| <b>T2D 20</b> | M          | 66                 | 30.0                          | Stroke                                   | Oral drug           | 513                        | 379                         |
| <b>T2D 21</b> | F          | 66                 | 34.1                          | Myocardial infarction                    | Oral drug           | 418                        | 156                         |
| <b>T2D 22</b> | F          | 67                 | 26.2                          | Stroke                                   | Oral drug           | 280                        | 130                         |
| <b>T2D 23</b> | F          | 67                 | 38.5                          | Septic shock                             | Insulin             | 758                        | 819                         |
| <b>T2D 24</b> | M          | 68                 | 24.5                          | Post-surgical septic shock               | Oral drug           | 361                        | 426                         |
| <b>T2D 25</b> | M          | 69                 | 27.3                          | Cardiogenic shock                        | Insulin             | 673                        | 358                         |
| <b>T2D 26</b> | M          | 69                 | 36.0                          | Stroke                                   | Insulin             | 617                        | 411                         |
| <b>T2D 27</b> | F          | 71                 | 21.9                          | Stroke                                   | Oral drug           | 270                        | 102                         |

| <b>ID</b>     | <b>Sex</b> | <b>Age (years)</b> | <b>BMI (kg/m<sup>2</sup>)</b> | <b>Cause of death</b>                             | <b>Treatment</b> | <b>Beta cell mass (mg)</b> | <b>Alpha cell mass (mg)</b> |
|---------------|------------|--------------------|-------------------------------|---------------------------------------------------|------------------|----------------------------|-----------------------------|
| <b>T2D 28</b> | M          | 71                 | 26.1                          | Myocardial infarction                             | Oral drug        | 532                        | 437                         |
| <b>T2D 29</b> | M          | 71                 | 40.9                          | Congestive heart failure                          | Oral drug        | 503                        | 177                         |
| <b>T2D 30</b> | F          | 73                 | 22.9                          | Myocardial infarction                             | Insulin          | 730                        | 514                         |
| <b>T2D 31</b> | F          | 73                 | 24.6                          | Myocardial infarction                             | Insulin          | 597                        | 378                         |
| <b>T2D 32</b> | M          | 73                 | 24.8                          | Myocardial infarction                             | Insulin          | 688                        | 254                         |
| <b>T2D 33</b> | M          | 73                 | 33.8                          | Dissection aortic aneurysm                        | Oral drug        | 585                        | 536                         |
| <b>T2D 34</b> | F          | 73                 | 34.5                          | Ventricular fibrillation                          | Oral drug        | 338                        | 195                         |
| <b>T2D 35</b> | F          | 73                 | 28.7                          | Sudden cardiac arrest                             | Insulin          | 478                        | 338                         |
| <b>T2D 36</b> | F          | 73                 | 54.2                          | Pneumonia                                         | Insulin          | 760                        | 240                         |
| <b>T2D 37</b> | F          | 74                 | 48.3                          | Pneumonia                                         | Insulin          | 246                        | 154                         |
| <b>T2D 38</b> | M          | 75                 | 16.3                          | Pneumonia                                         | Oral drug        | 380                        | 257                         |
| <b>T2D 39</b> | M          | 75                 | 25.7                          | Sudden cardio-respiratory arrest                  | Insulin          | 757                        | 420                         |
| <b>T2D 40</b> | F          | 75                 | 27.5                          | Myocardial infarction + pulmonary thromboembolism | Insulin          | 704                        | 522                         |
| <b>T2D 41</b> | F          | 78                 | 23.7                          | Pulmonary embolism                                | Oral drug        | 258                        | 154                         |
| <b>T2D 42</b> | M          | 78                 | 32.7                          | Myocardial infarction                             | Oral drug        | 340                        | 236                         |
| <b>T2D 43</b> | F          | 79                 | 24.8                          | Stroke                                            | Oral drug        | 704                        | 255                         |
| <b>T2D 44</b> | M          | 81                 | 25.7                          | Perforation of peptic ulcer + shock               | Oral drug        | 685                        | 677                         |
| <b>T2D 45</b> | M          | 81                 | 27.7                          | Leukaemia + pulmonary embolism                    | Insulin          | 550                        | 666                         |
| <b>T2D 46</b> | F          | 82                 | 19.5                          | Disseminated intravascular coagulation            | Oral drug        | 435                        | 289                         |
| <b>T2D 47</b> | F          | 83                 | 31.6                          | Myocardial infarction                             | Oral drug        | 656                        | 251                         |
| <b>T2D 48</b> | F          | 84                 | 19.5                          | Myocardial infarction                             | Insulin          | 468                        | 443                         |
| <b>T2D 49</b> | M          | 85                 | 29.4                          | Pulmonary thromboembolism                         | Insulin          | 509                        | 390                         |
| <b>T2D 50</b> | F          | 86                 | 28.9                          | Pulmonary embolism                                | Insulin          | 396                        | 152                         |

M, male; F, female
